# Supplementary material for: The use of fluoxetine by veterinarians in dogs and cats: a preliminary survey
Source: PubMed Central journal article supplement — Vet Rec Open. 2016 Apr 8;3(1):e000146. doi: 10.1136/vetreco-2015-000146 (PMC4838767; doi:10.1136/vetreco-2015-000146), 2016-04-08
Supplement: vetreco-2015-000146supp.pdf [file vetreco-2015-000146supp.pdf]

Reset Form

### Fluoxetine Study Form for Veterinarians

All the information you provide in this form will be confidential and all data will be pooled and reported in aggregate.

Please mark the appropriate choice or write wherever indicated.

| Question                                                            | Response                                                         |           |
|---------------------------------------------------------------------|------------------------------------------------------------------|-----------|
| Do you ever prescribe fluoxetine/Prozac®/Reconcile®?                | No<br>Yes                                                        |           |
| For what do you prescribe fluoxetine/Prozac®/Reconcile®?            | Canine                                                           | Feline    |
| What frequency of dosage do you prescribe?                          | Once/24hr<br>Twice/24hr<br>Other                                 |           |
| If you prescribe once/24hr dosage, do you indicate am or pm dosing? | am<br>pm<br>neither                                              |           |
| What form of fluoxetine do you prescribe?                           | Compounded<br>Generic<br>Prozac®<br>Reconcile® (Elanco)<br>Other |           |
| Name of Veterinary Medical School?                                  |                                                                  |           |
| Year of graduation?                                                 |                                                                  |           |
| Are you Board Certified                                             | No<br>Yes                                                        | Specialty |
| Will you be interested in helping further with this project?        | Yes<br>No<br>Maybe, please send more information                 |           |
|                                                                     | Name:                                                            |           |
|                                                                     | Email:                                                           |           |
|                                                                     | Phone Number:                                                    |           |

Please respond using one of the following methods:

- Send through Adobe Acrobat: **Submit button at top of page**
- Email saved copy: **gkaur@westernu.edu**
- Fax copy to Dr. Gagandeep Kaur: **909.469.5635**

**Please direct questions to Gagandeep Kaur, DVM, PhD - gkaur@westernu.edu**  
**Thank you for your time and input on this study**
